# Supplementary figures and images for: Does the Diabetes Health Plan Have a Differential Impact on Medication Adherence Among Beneficiaries with Fewer Financial Resources?
Source: Research Square preprint supplement (doi:10.21203/rs.3.rs-521335/v1), 2021-06-14

**Appendix**. Sample derivation for Diabetes Health Plan (A) and Control Beneficiaries (B)

A)


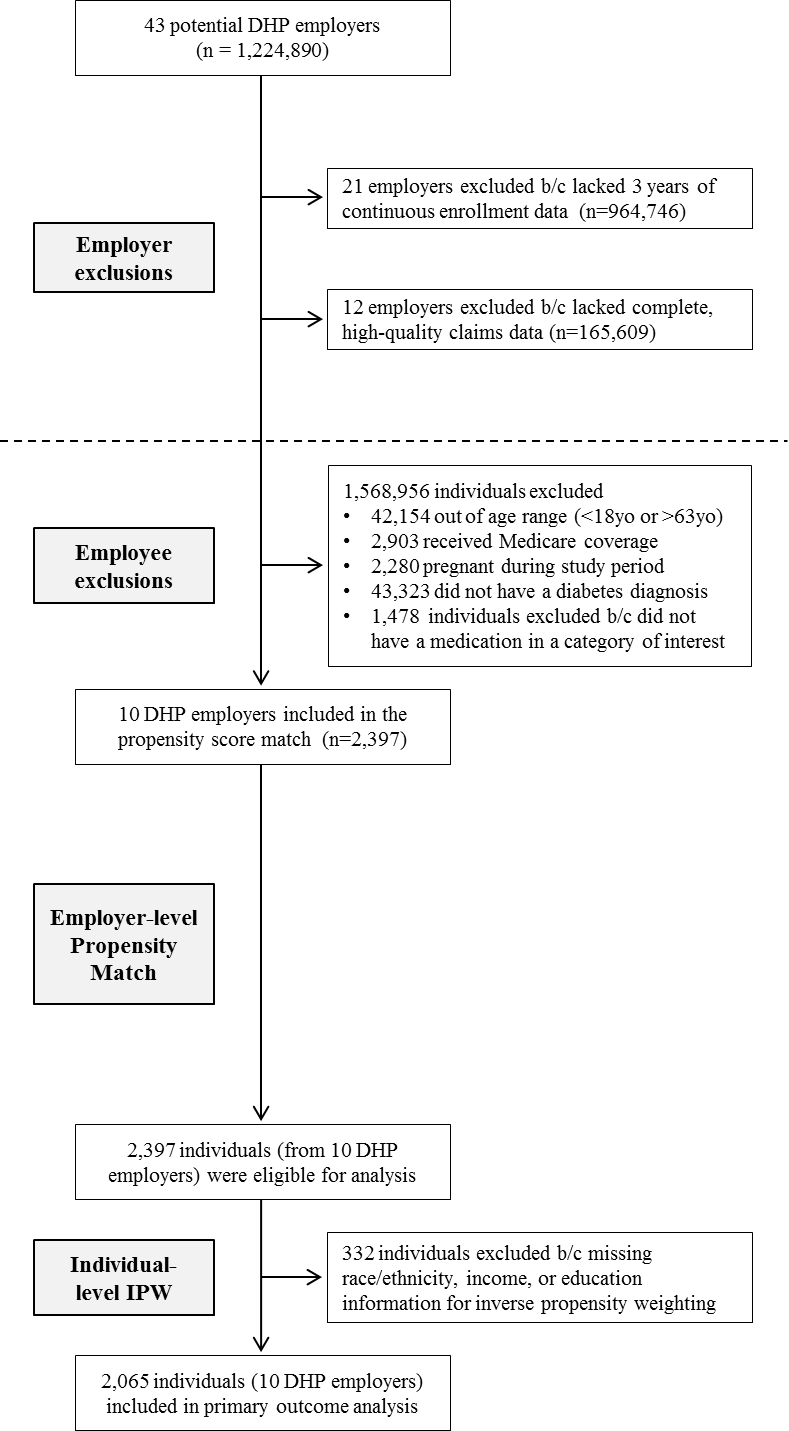


**B)**


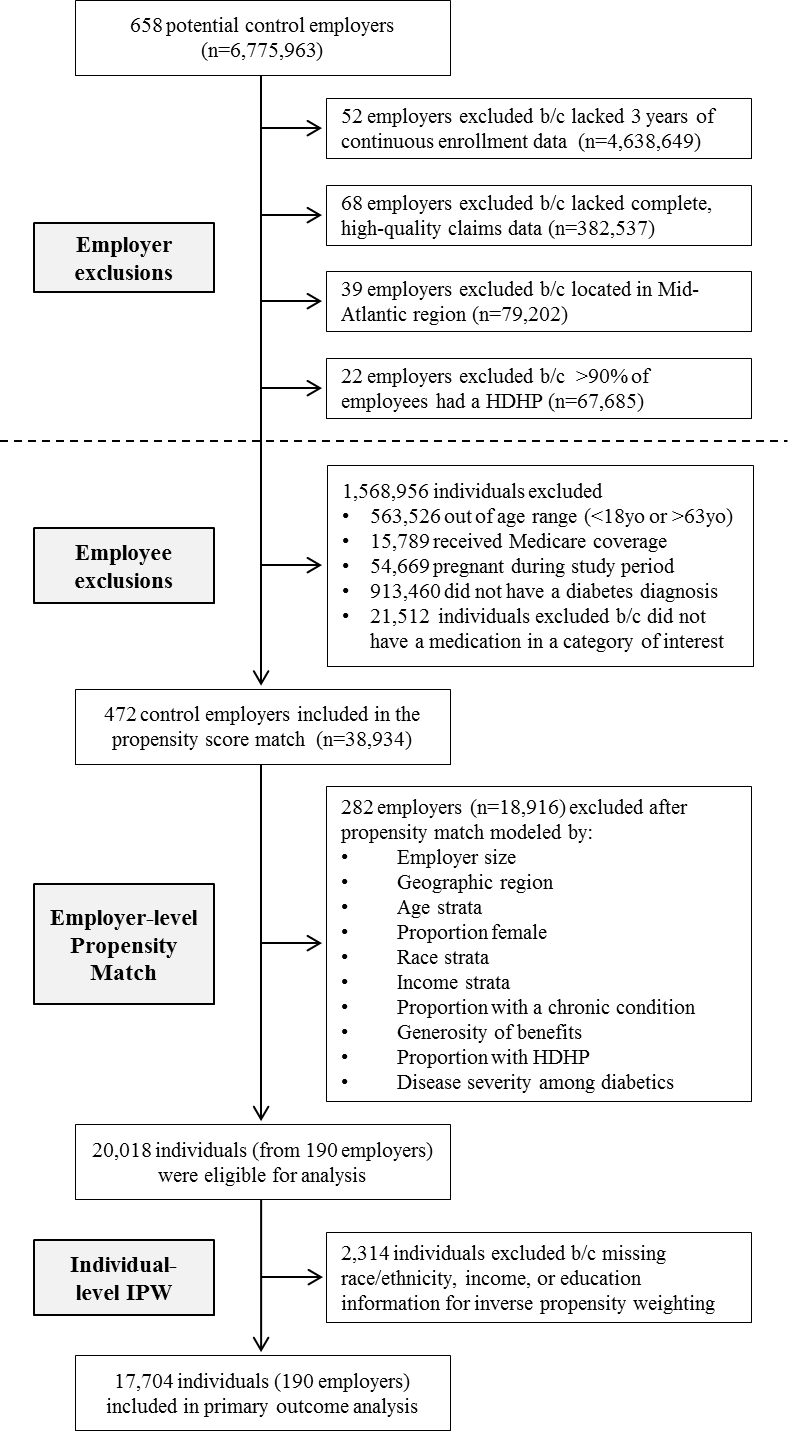

Supplement: Supplementary file 1 [file 1cb492210db2bcae8830705d.docx]
